# Supplementary material for: Non-toxic catalysts for ring-opening polymerizations of biodegradable polymers at room temperature for biohybrid materials
Source: Royal Society of Chemistry journal article supplement (doi:10.1039/c3gc42044b), 2013-12-05
Supplement: c3gc42044b.pdf [file c3gc42044b.pdf]

# Green non-toxic catalysts for ring-opening polymerizations of biodegradable polymers at room temperature for biohybrid materials

Cordula S. Hege,<sup>a,c,d</sup> Stefan M. Schiller<sup>a,b,c,e,f,\*</sup>

<sup>a</sup>Institute for Macromolecular Chemistry, Albert-Ludwigs-Universität Freiburg, Stefan-Meier-Str.31, 79104 Freiburg, Germany

<sup>b</sup>Institute for Pharmaceutical Sciences, Albert-Ludwigs-Universität Freiburg, Albertstraße 25, 79104 Freiburg 79104 Freiburg, Germany

<sup>c</sup>Freiburg Institute for Advanced Studies – FRIAS, School of Soft Matter Research Albert-Ludwigs-Universität Freiburg, Albertstraße 19, 79104 Freiburg, Germany

<sup>d</sup>IMTEK, Albert-Ludwigs-Universität Freiburg, Georges-Köhler-Allee 103, 79110 Freiburg, Germany

<sup>e</sup>Faculty of Chemistry and Pharmacy, Albert-Ludwigs-Universität Freiburg, Fahnbergplatz, 79104 Freiburg, Germany

<sup>f</sup>BIOSS Centre for Biological Signalling Studies, Albert-Ludwigs-Universität Freiburg, Hebelstrasse 25, D-79104 Freiburg

|                                                                                         |    |
|-----------------------------------------------------------------------------------------|----|
| <i>Iron(II)bromide 400:1:5 Benzyl alcohol <sup>1</sup>H-NMR</i> .....                   | 2  |
| <i>Iron(III)bromide, 400:1:5, Benzyl alcohol, MALDI-TOF</i> .....                       | 2  |
| <i>Iron(III)chloride, 400:1:5, Benzyl alcohol, <sup>1</sup>H-NMR</i> .....              | 3  |
| <i>Iron(III)chloride, 400:1:5, Benzyl alcohol, MALDI-TOF</i> .....                      | 3  |
| <i>6 Iron(III)chloride, 400:1:5, Benzyl alcohol, MALDI-TOF detail</i> .....             | 4  |
| <i>Iron(III)perchlorate, 400:1:5, Benzyl alcohol, <sup>1</sup>H-NMR</i> .....           | 4  |
| <i>Iron(III)perchlorate, 400:1:5, Benzyl alcohol, <sup>13</sup>C-NMR</i> .....          | 5  |
| <i>Iron(III)perchlorate, 400:1:5, Benzyl alcohol, MALDI-TOF</i> .....                   | 5  |
| <i>11 Iron(III)perchlorate, 400:1:5, Benzyl alcohol, MALDI-TOF detail</i> .....         | 6  |
| <i>Iron(III)perchlorate, 400:1:5, water, <sup>1</sup>H-NMR</i> .....                    | 6  |
| <i>Iron(III)perchlorate, 400:1:5, water, <sup>13</sup>C-NMR</i> .....                   | 7  |
| <i>Iron(III)perchlorate, 400:1:5, water, MALDI-TOF</i> .....                            | 7  |
| <i>Iron(III)perchlorate, 400:1:5, water, MALDI-TOF</i> .....                            | 8  |
| <i>Iron(III)perchlorate, 400:1:5, 2-Propanol, <sup>1</sup>H-NMR</i> .....               | 8  |
| <i>Iron(III)perchlorate, 400:1:5, 2-Propanol, <sup>13</sup>C-NMR</i> .....              | 9  |
| <i>Iron(III)perchlorate, 400:1:5, 2-Propanol, MALDI-TOF</i> .....                       | 9  |
| <i>Iron(III)perchlorate, 400:1:5, 2-Propanol, MALDI-TOF detail</i> .....                | 10 |
| <i>Iron(III)perchlorate, 400:1:5, 2-Allylphenol, <sup>1</sup>H-NMR</i> .....            | 10 |
| <i>Iron(III)perchlorate, 400:1:5, 2-Allylphenol, <sup>13</sup>C-NMR</i> .....           | 11 |
| <i>Iron(III)perchlorate, 400:1:5, 2-Allylphenol, MALDI-TOF</i> .....                    | 11 |
| <i>Iron(III)perchlorate, 400:1:5, 2-Allylphenol, MALDI-TOF details</i> .....            | 12 |
| <i>Kinetic experiment with Iron(III)perchlorate and Allylphenol</i> .....               | 12 |
| <i>UV-Vis Experiment Iron(III)perchlorate with 2-Allylphenol in Ethyl acetate</i> ..... | 13 |

### Iron(III) bromide

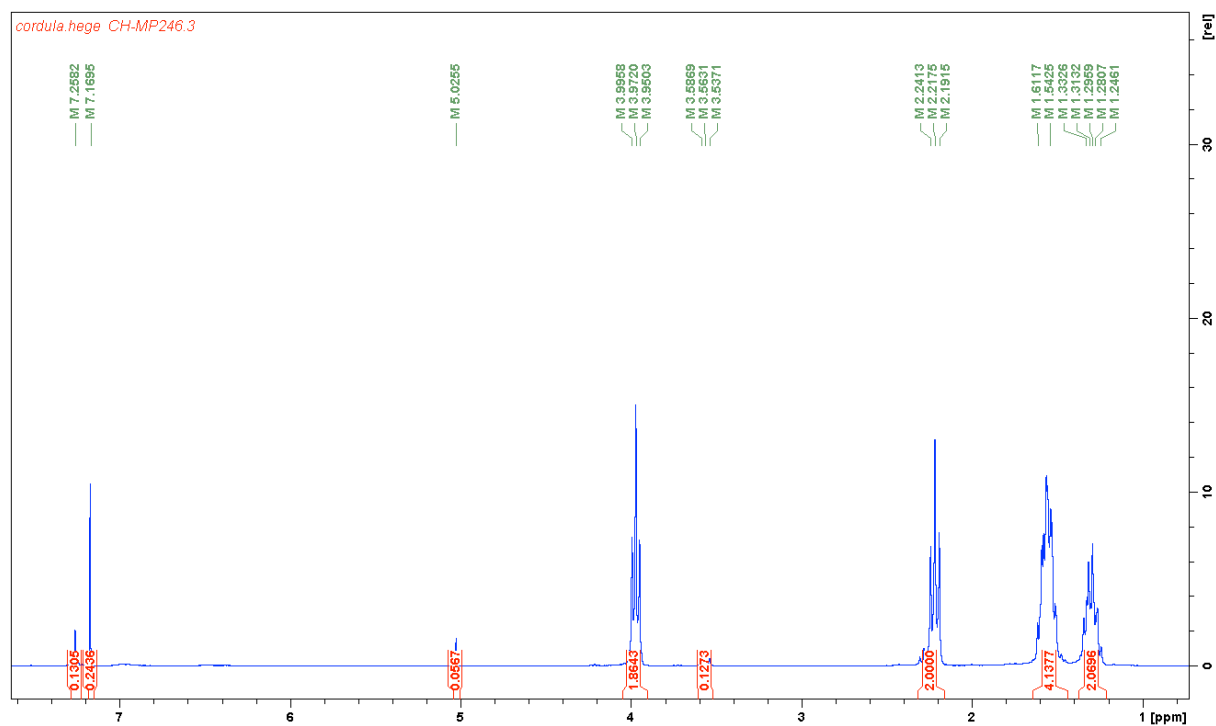

Figure 1. Iron(II) bromide 400:1:5 benzyl alcohol <sup>1</sup>H NMR

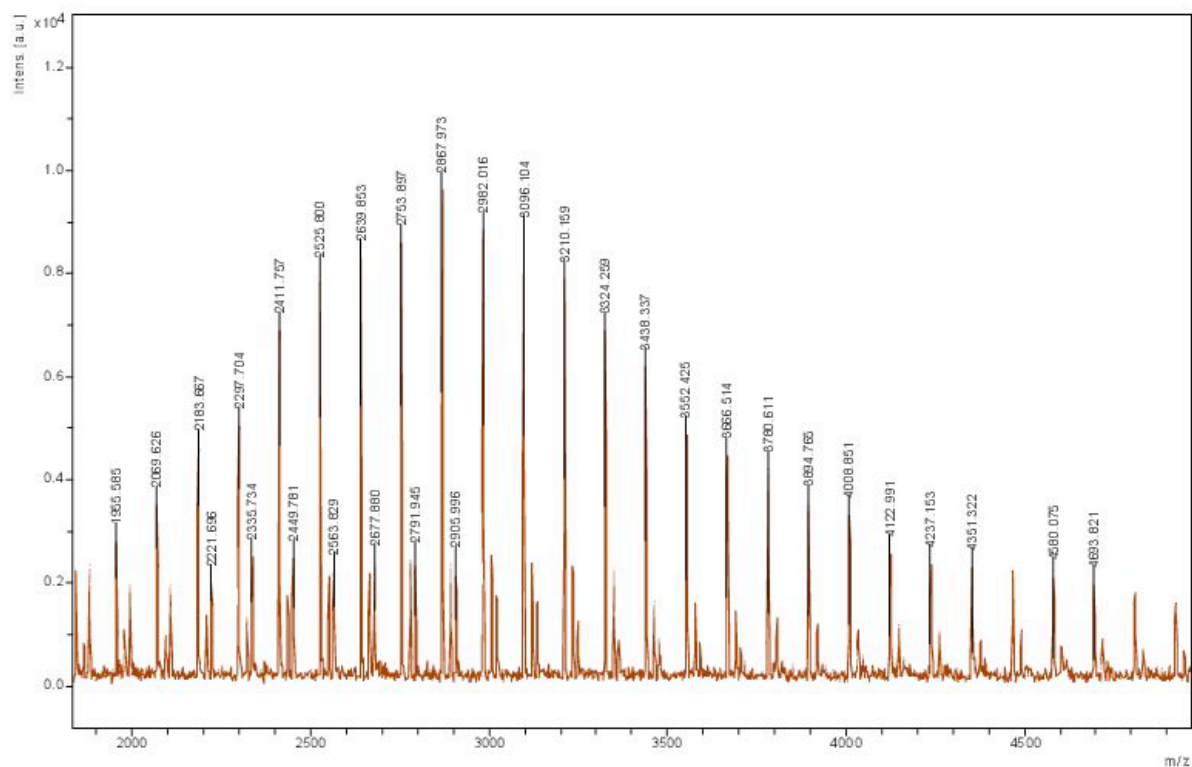

Figure 2. Iron(III) bromide, 400:1:5, benzyl alcohol, MALDI-TOF

### Iron(III) chloride 400:1:5 benzyl alcohol

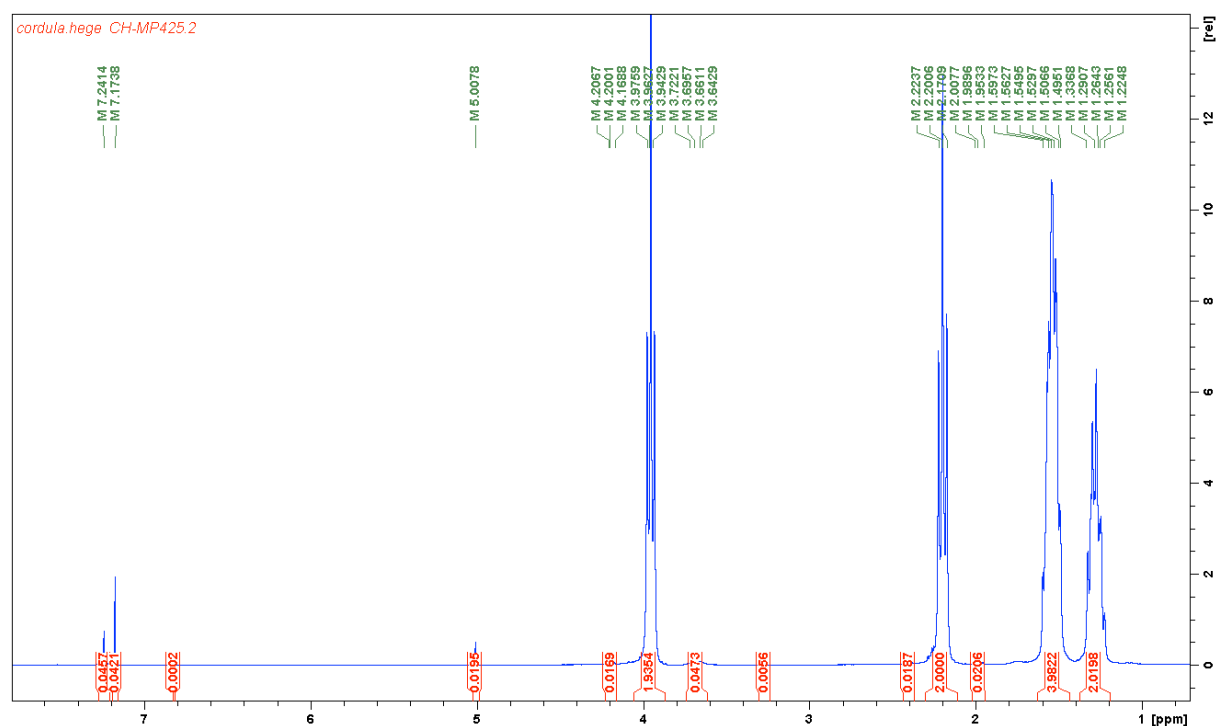

Figure 3. Iron(III) chloride, 400:1:5, benzyl alcohol,  $^1\text{H-NMR}$

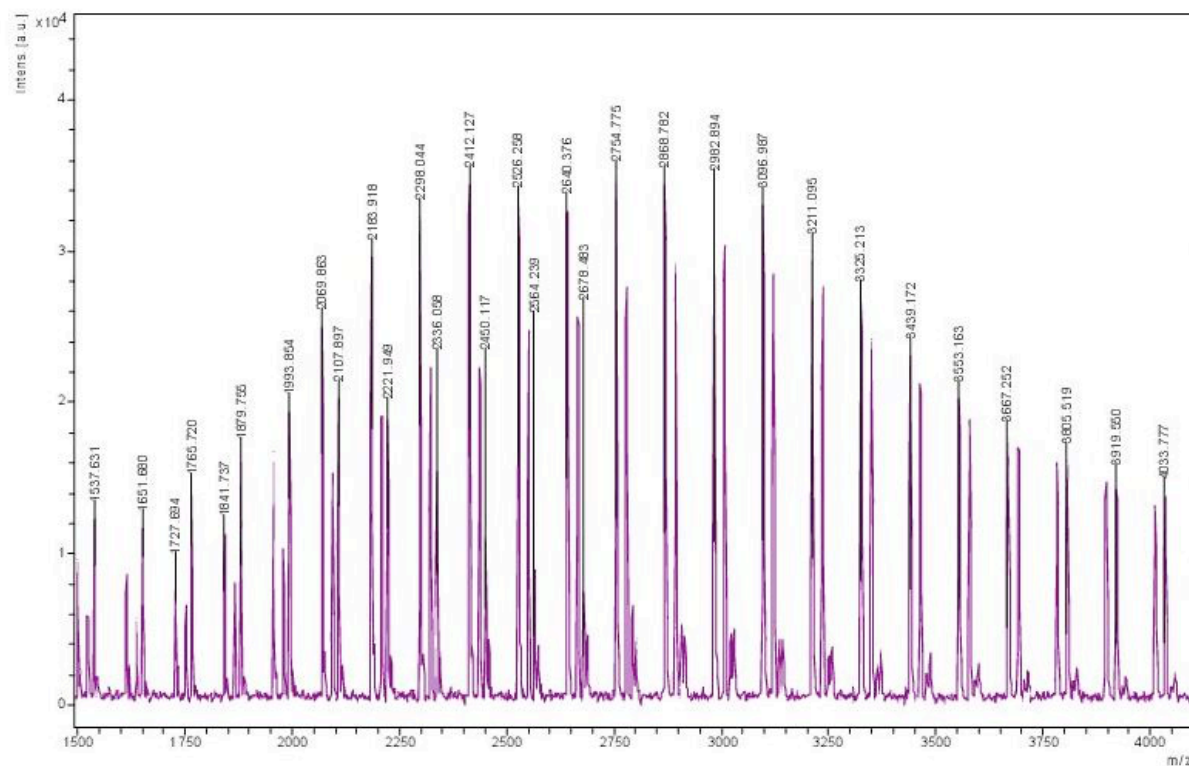

Figure 4. Iron(III) chloride, 400:1:5, benzyl alcohol, MALDI-TOF

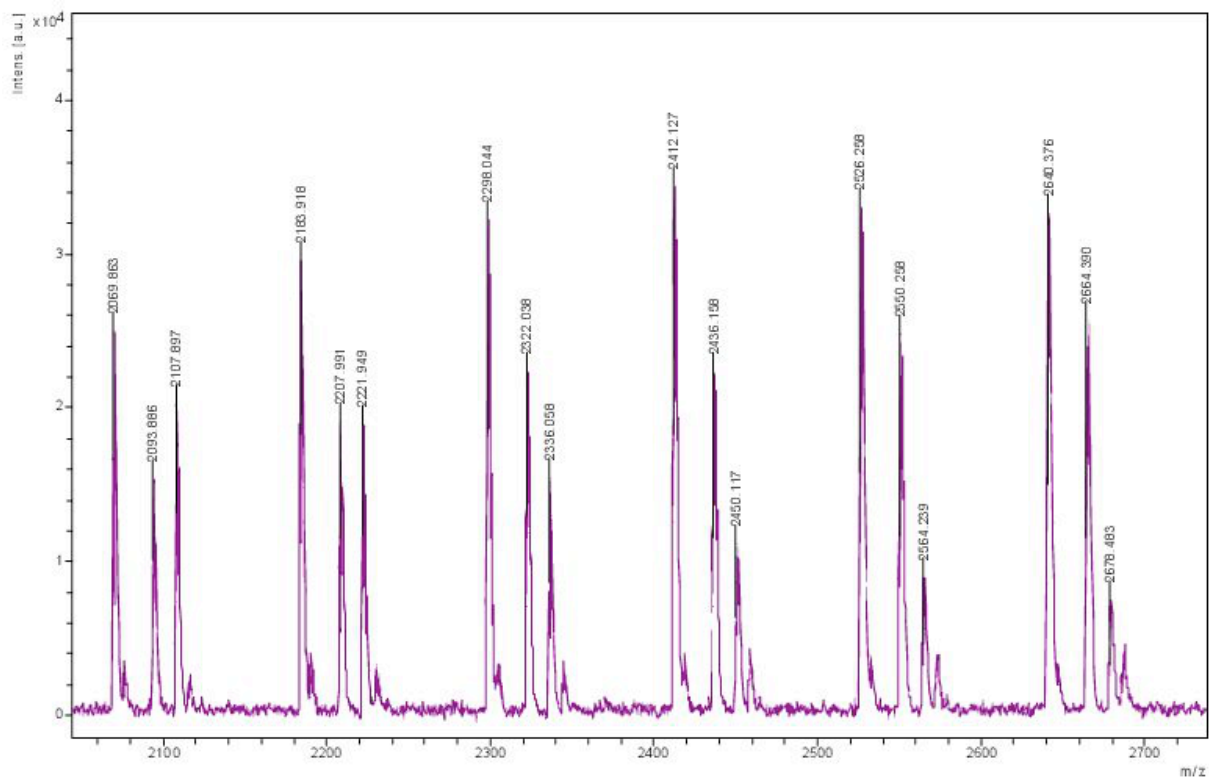

Figure 5. Iron(III) chloride, 400:1:5, benzyl alcohol, MALDI-TOF detail

### Iron(III) perchlorate 400:1:5 benzyl alcohol

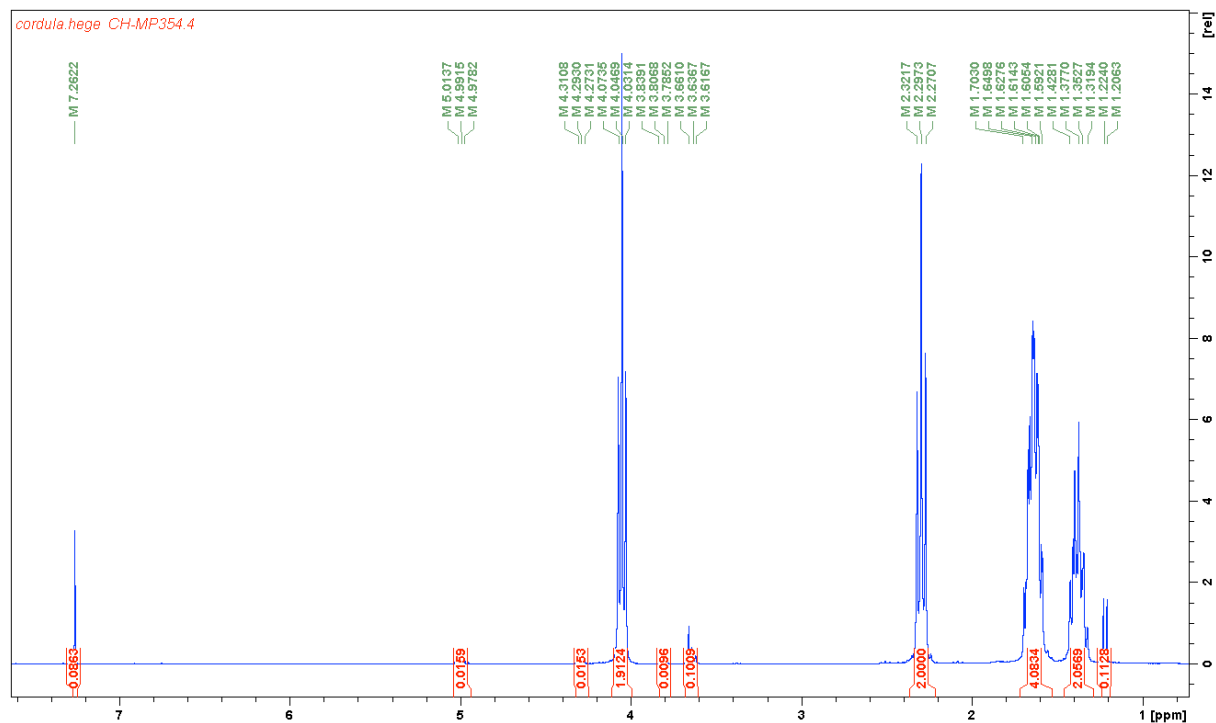

Figure 6. Iron(III) perchlorate, 400:1:5, benzyl alcohol, <sup>1</sup>H-NMR

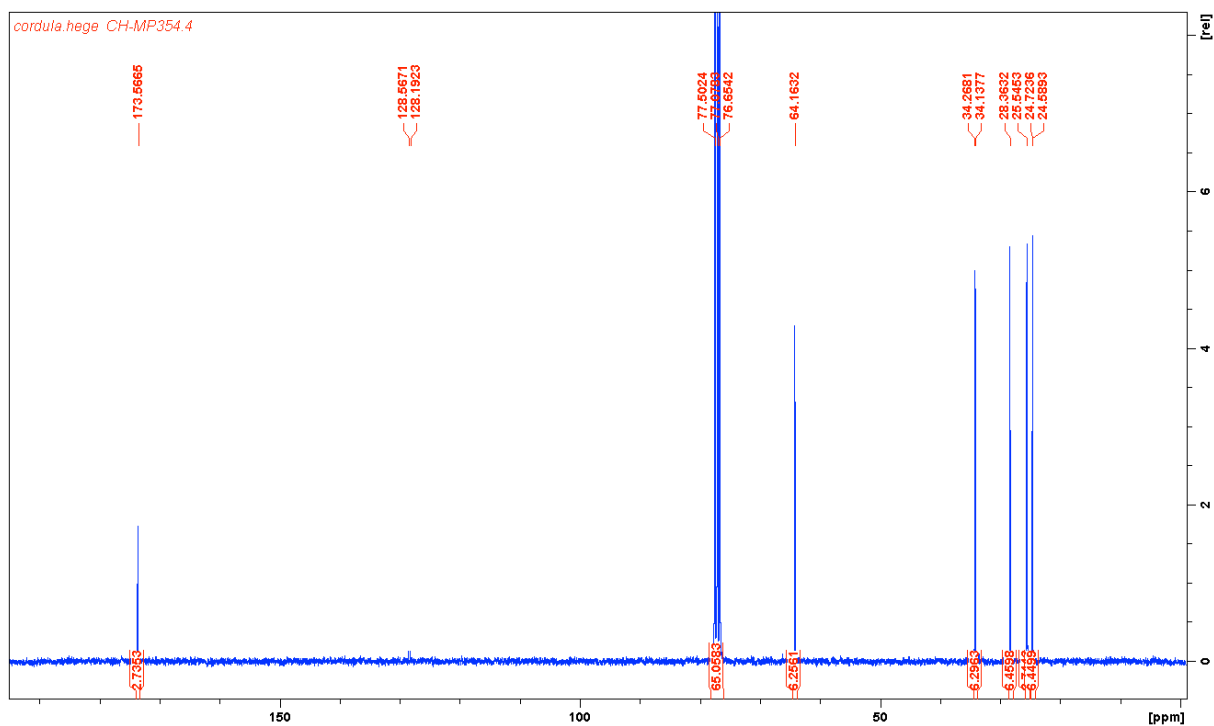

Figure 7 Iron(III) perchlorate, 400:1:5, benzyl alcohol,  $^{13}\text{C}$ -NMR

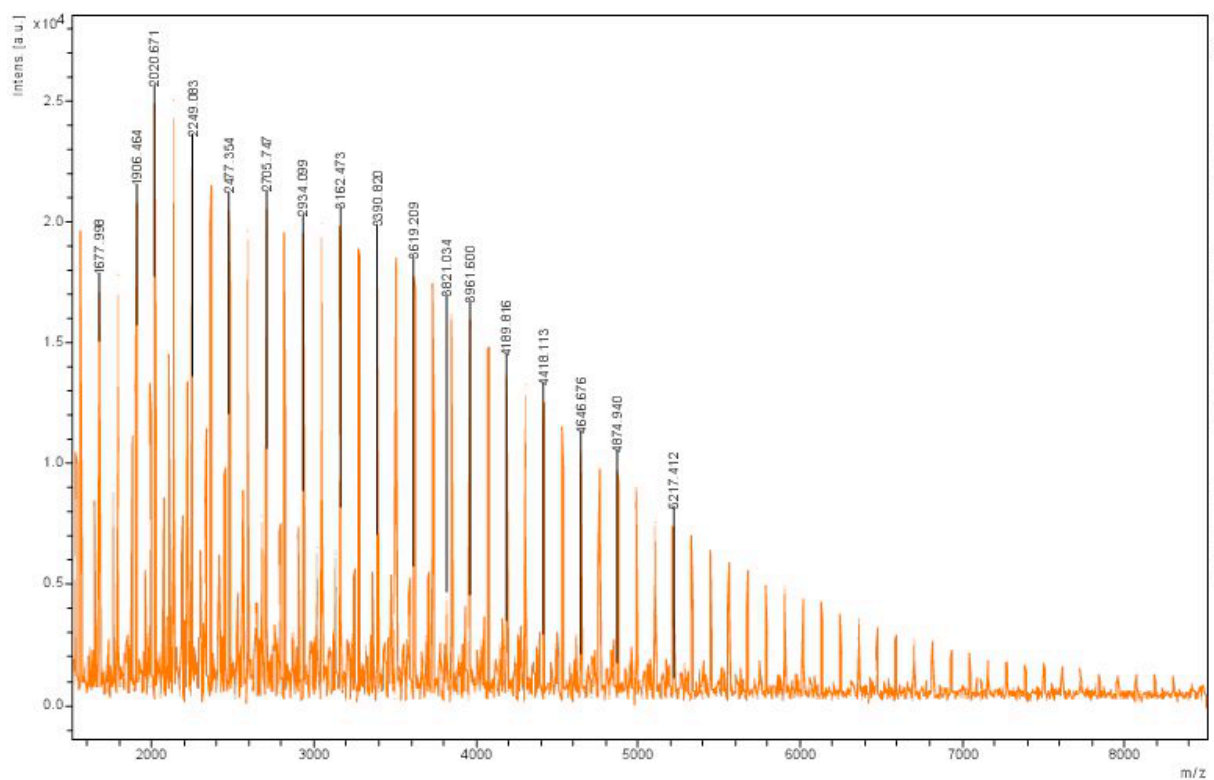

Figure 8. Iron(III) perchlorate, 400:1:5, benzyl alcohol, MALDI-TOF

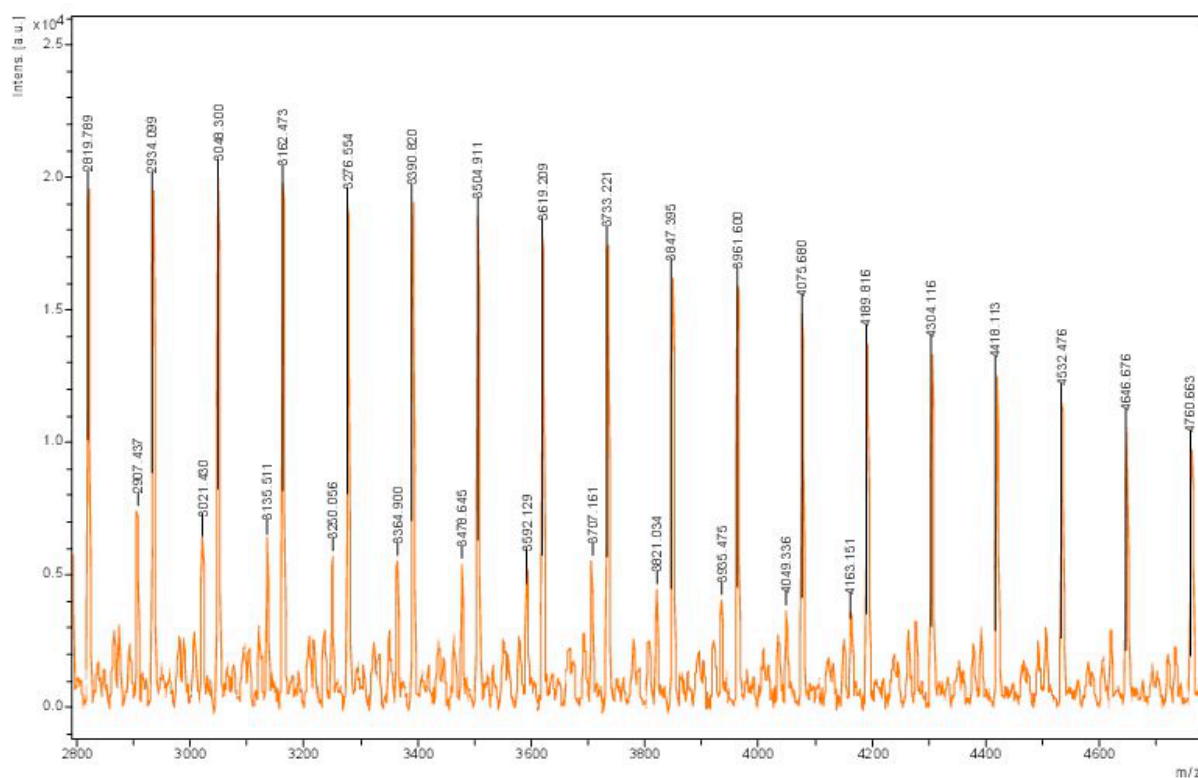

Figure 9. Iron(III) perchlorate, 400:1:5, benzyl alcohol, MALDI-TOF detail

Iron(III) perchlorate 400:1:5, water

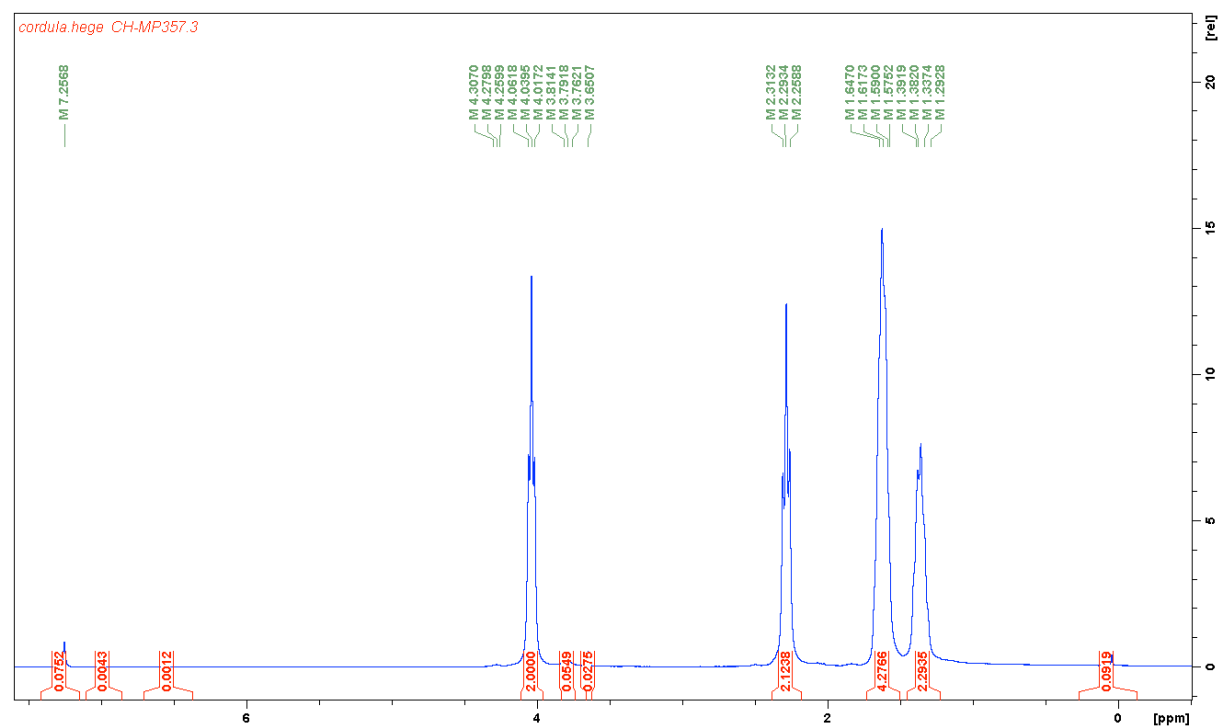

Figure 10. Iron(III) perchlorate, 400:1:5, water, <sup>1</sup>H-NMR

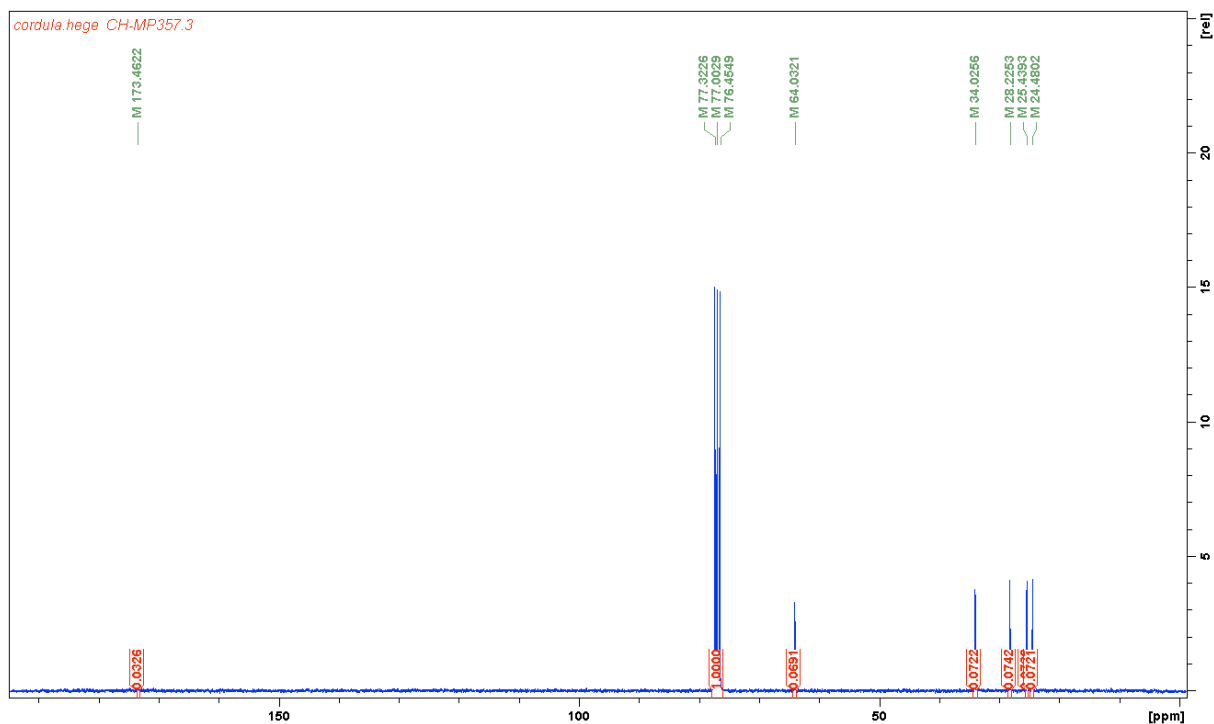

Figure 11. Iron(III) perchlorate, 400:1:5, water,  $^{13}\text{C}$ -NMR

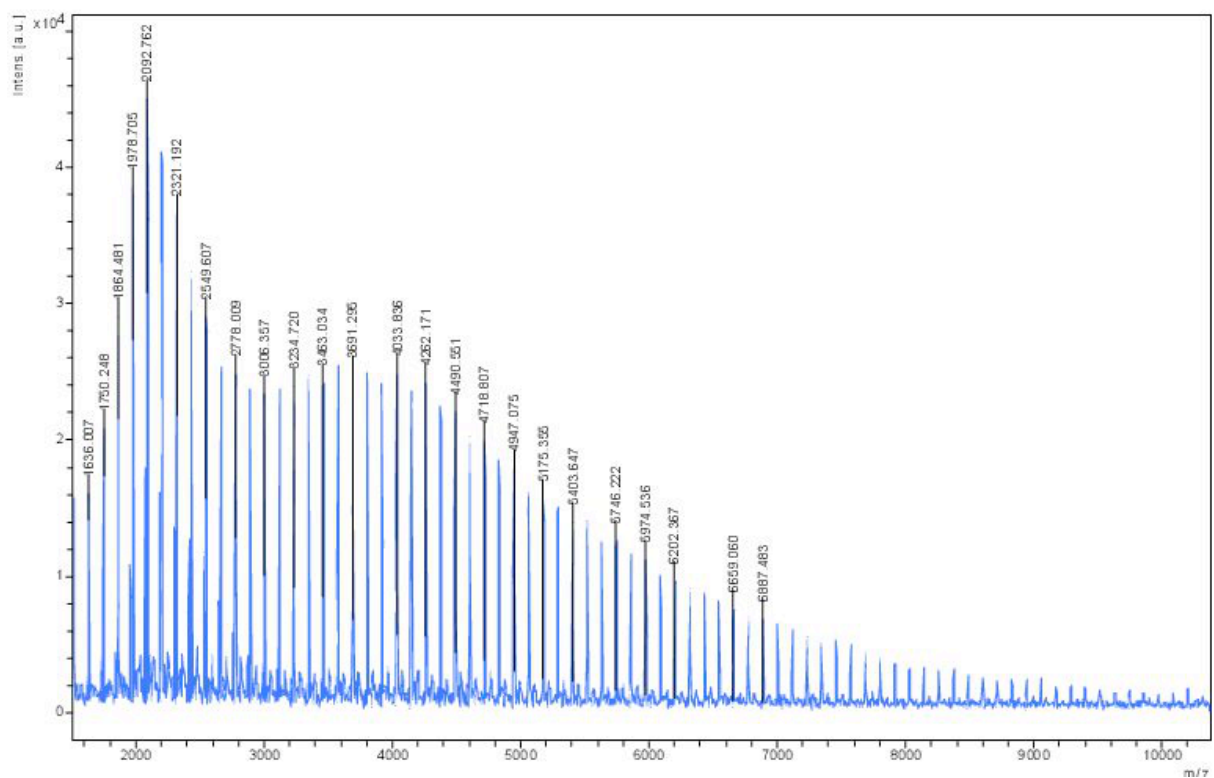

Figure 12. Iron(III) perchlorate, 400:1:5, water, MALI-TOF

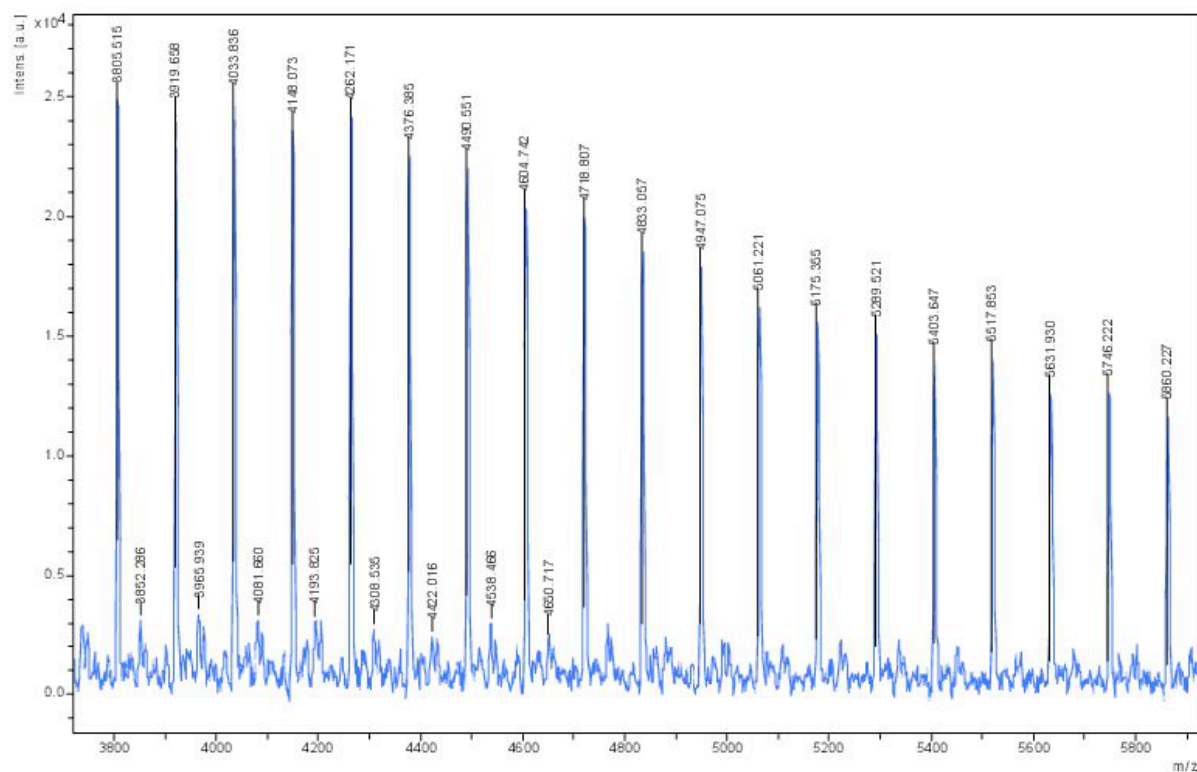

Figure 13. Iron(III) perchlorate, 400:1:5, water, MALDI-TOF

### Iron(III) perchlorate, 400:1:5, 2-propanol

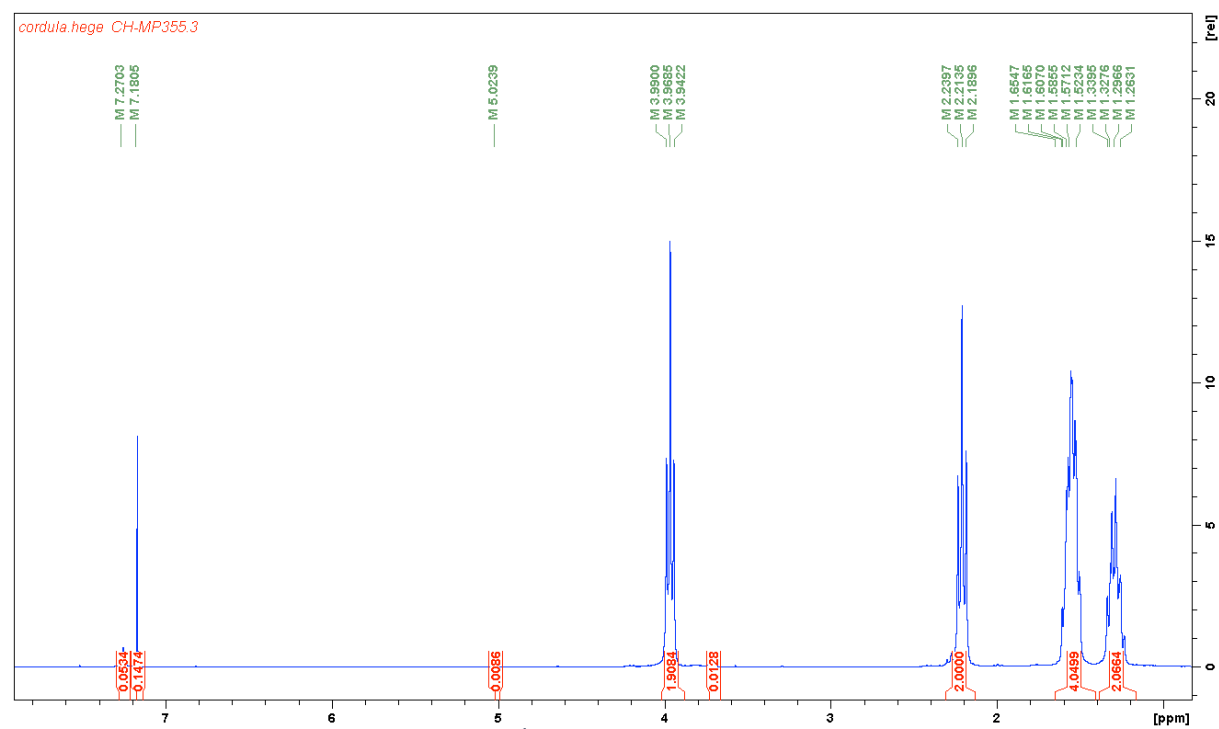

Figure 14. Iron(III) perchlorate, 400:1:5, 2-propanol,  $^1\text{H-NMR}$



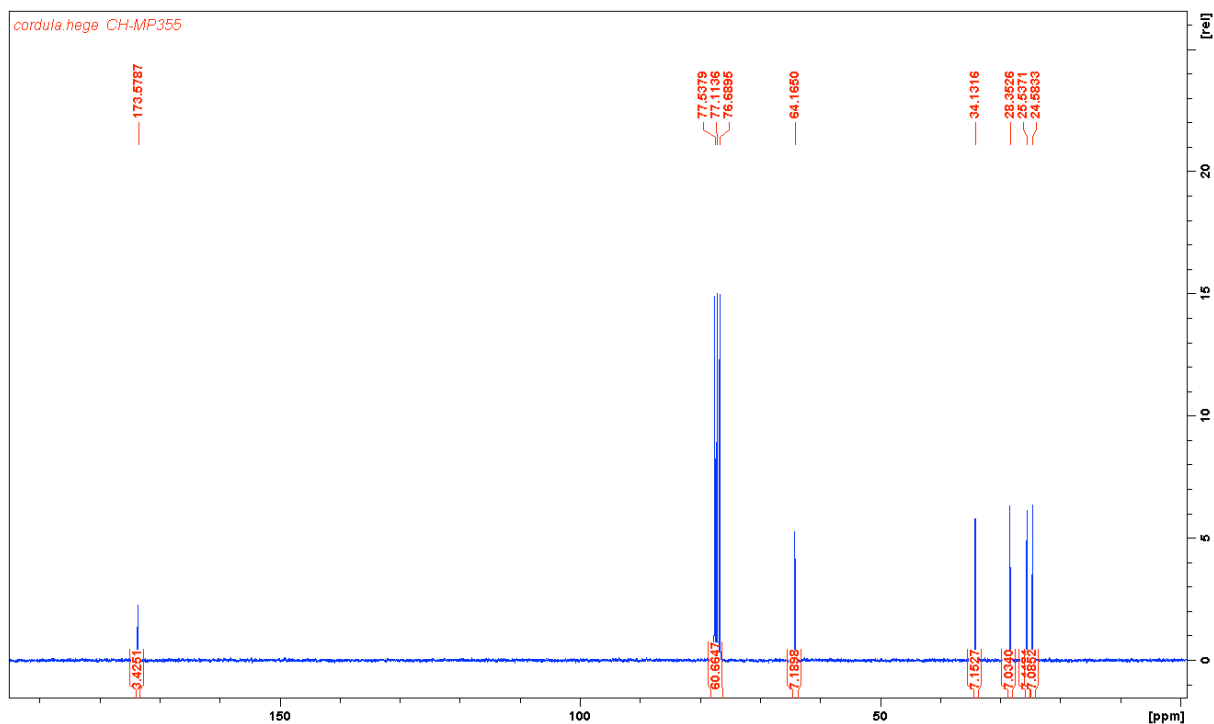

Figure 15. Iron(III) perchlorate, 400:1:5, 2-propanol,  $^{13}\text{C}$ -NMR

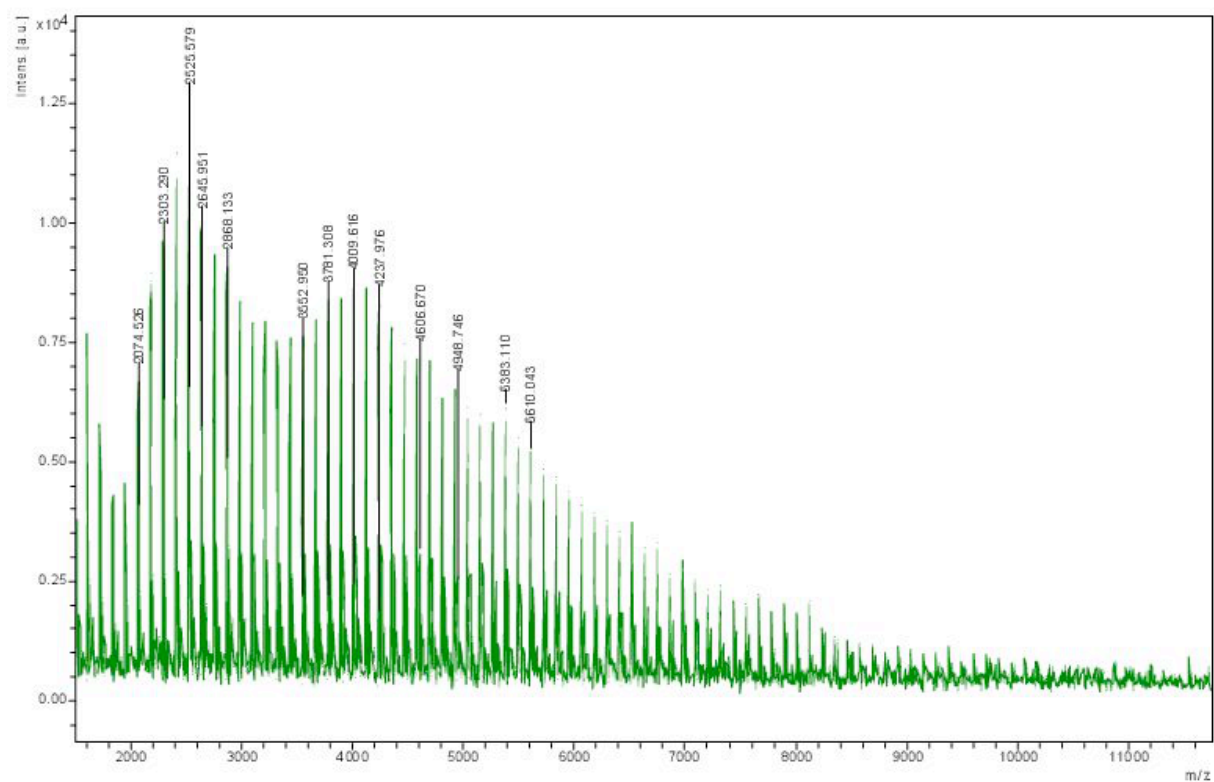

Figure 16. Iron(III) perchlorate, 400:1:5, 2-propanol, MALDI-TOF

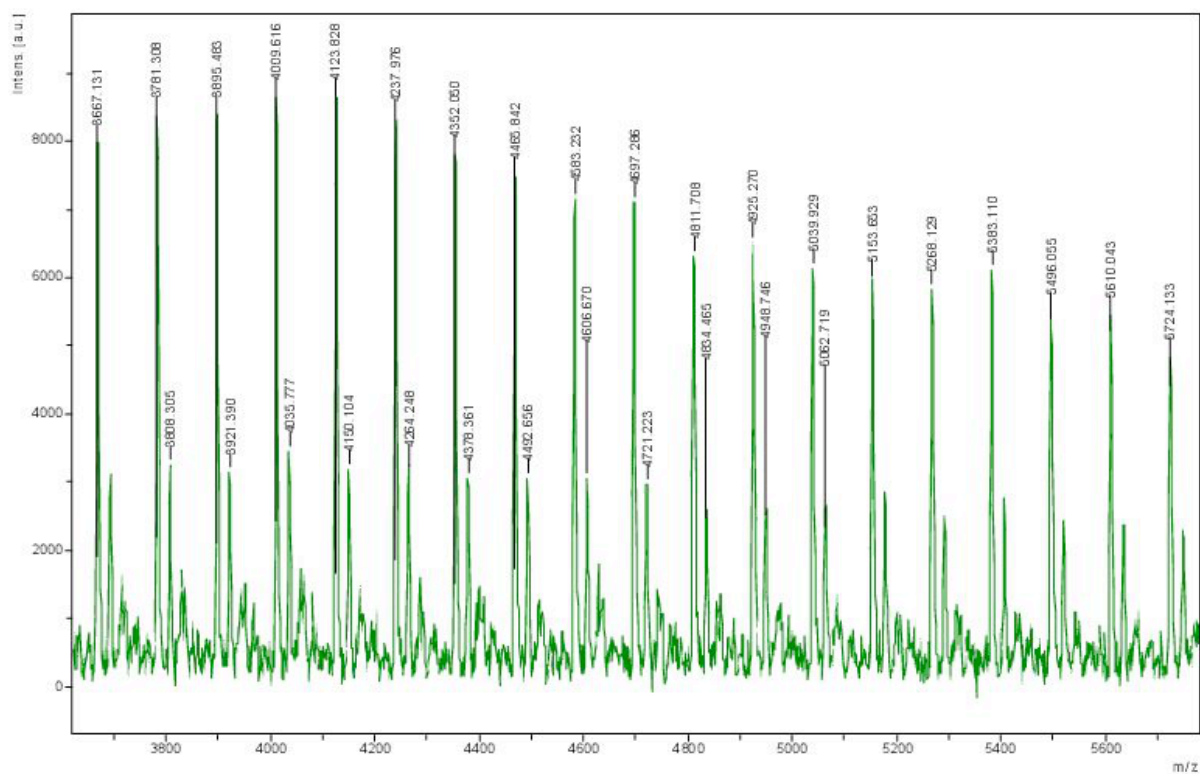

Figure 17. Iron(III) perchlorate, 400:1:5, 2-propanol, MALDI-TOF detail

### Iron(III) perchlorate, 400:1:5, 2-allylphenol

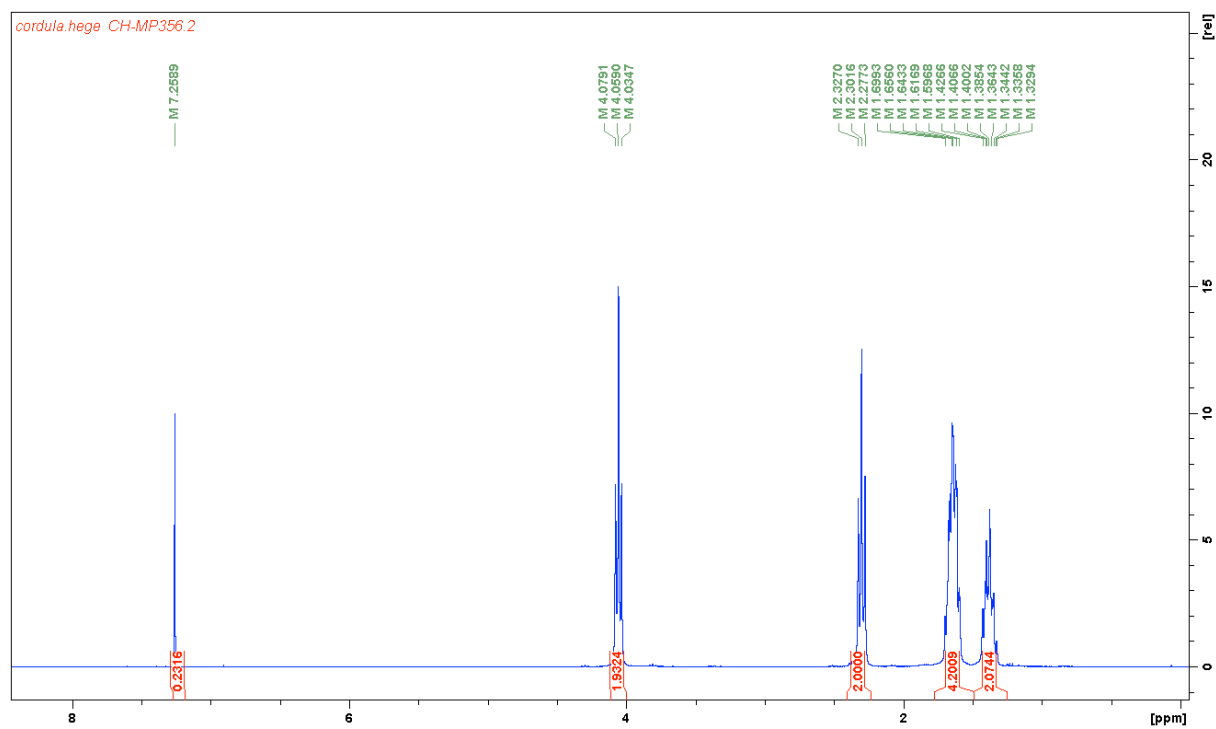

Figure 18. Iron(III) perchlorate, 400:1:5, 2-allylphenol, <sup>1</sup>H-NMR

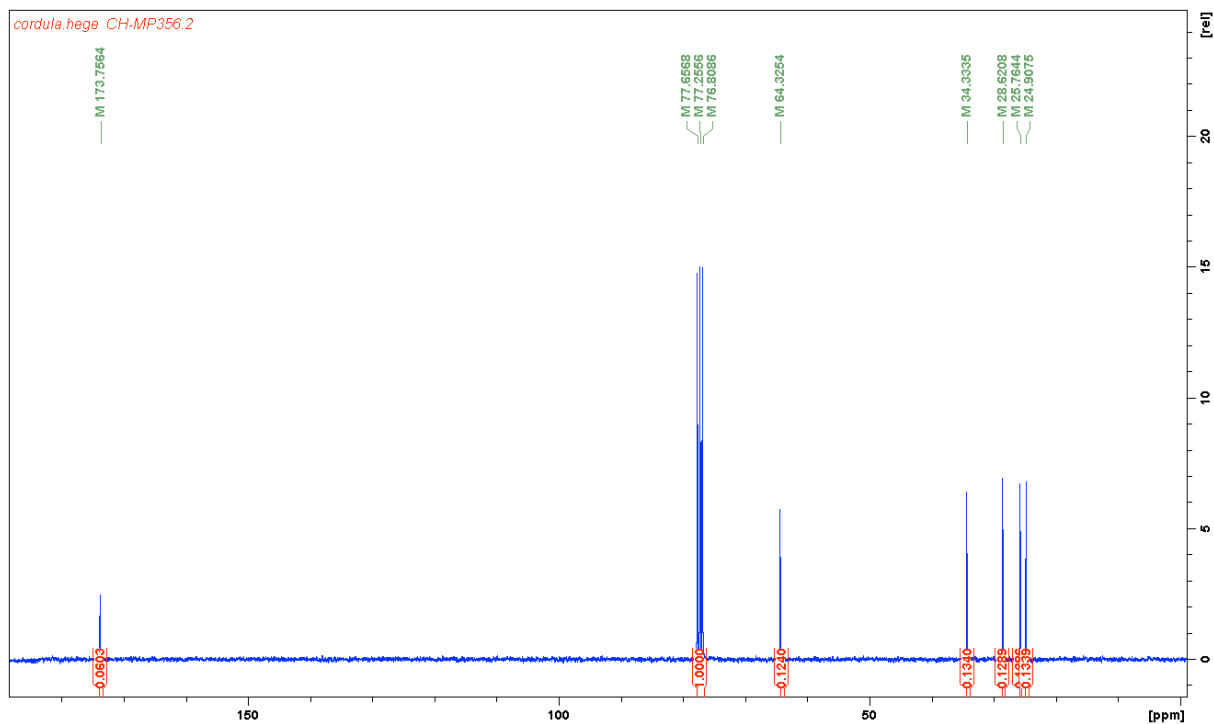

Figure 19 Iron(III) perchlorate, 400:1:5, 2-allylphenol,  $^{13}\text{C-NMR}$

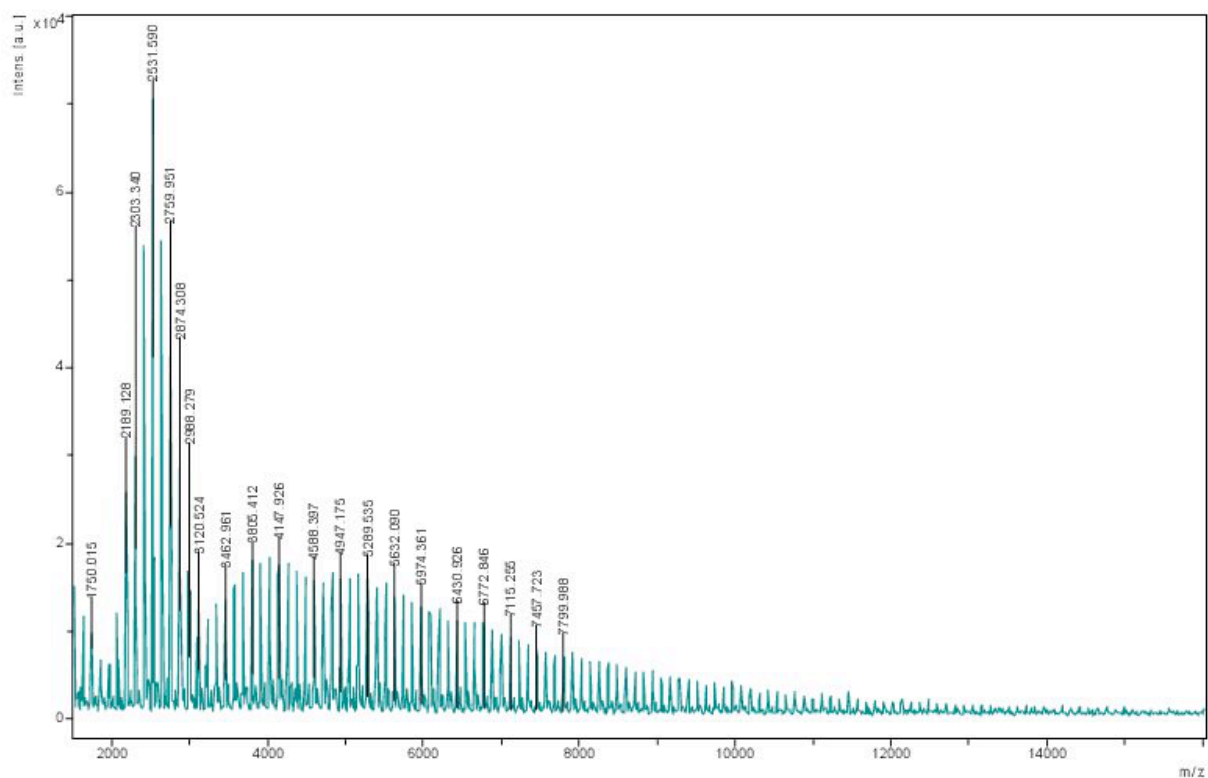

Figure 20. Iron(III) perchlorate, 400:1:5, 2-allylphenol, MALDI-TOF

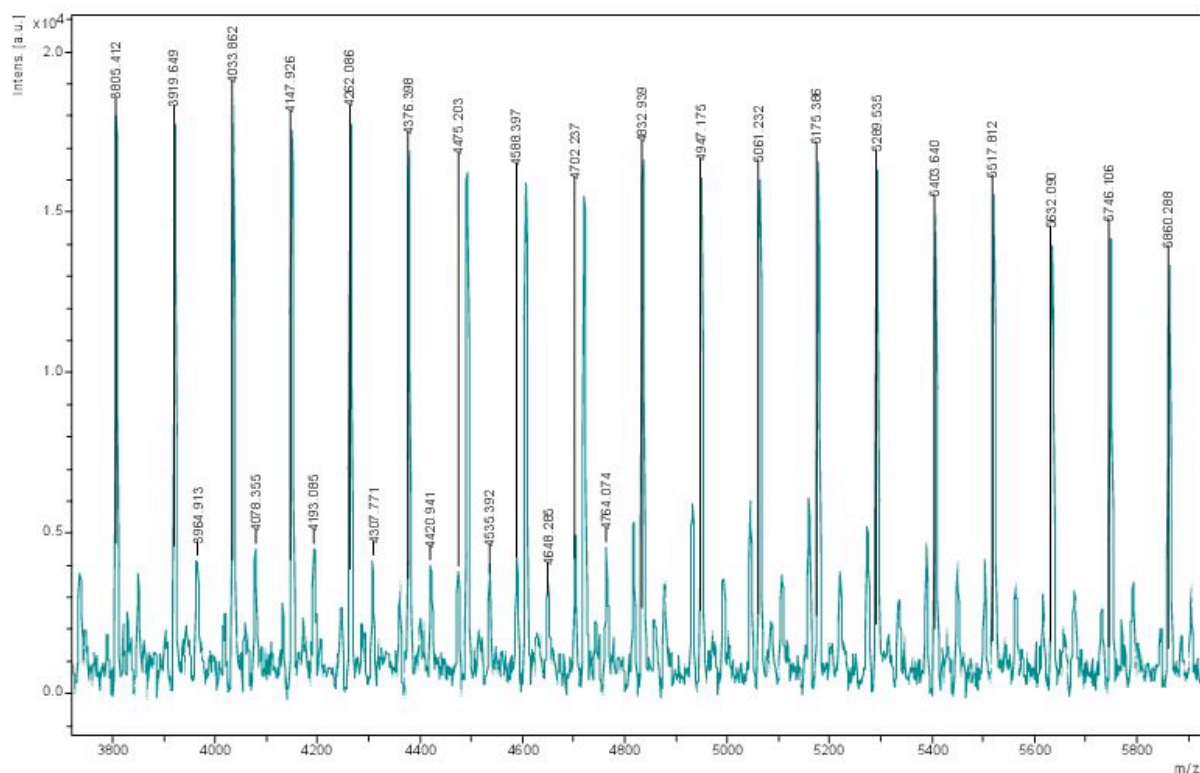

Figure 21. Iron(III) perchlorate, 400:1:5, 2-allylphenol, MALDI-TOF details

### Allylphenol Experiments

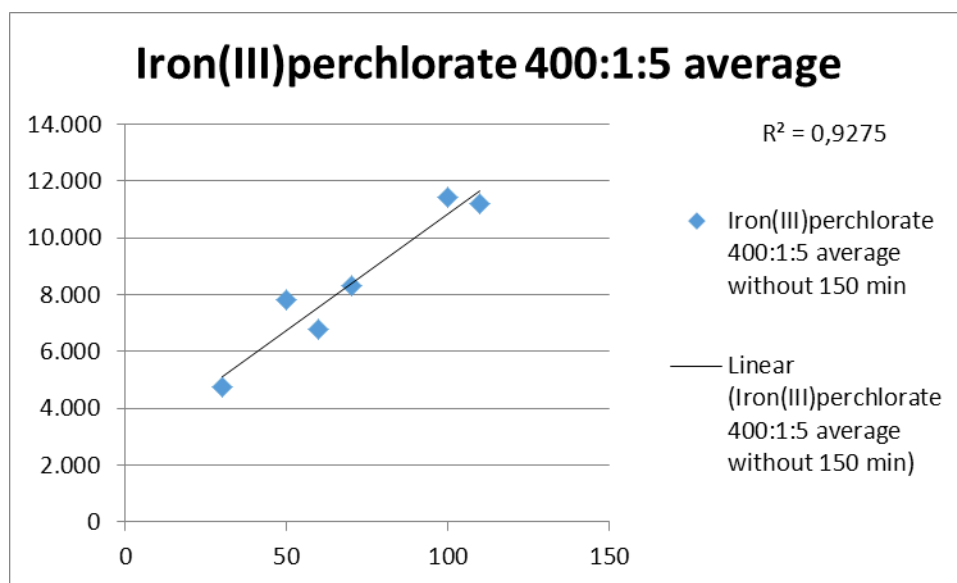

Figure 22. Kinetic experiment with iron(III) perchlorate and 2-allylphenol at 25 °C

Average of three experiments, the reaction is usually completed after 2 hours.

### UV-Vis experiment: Iron(III) perchlorate in ethylacetate with 2-allylphenol

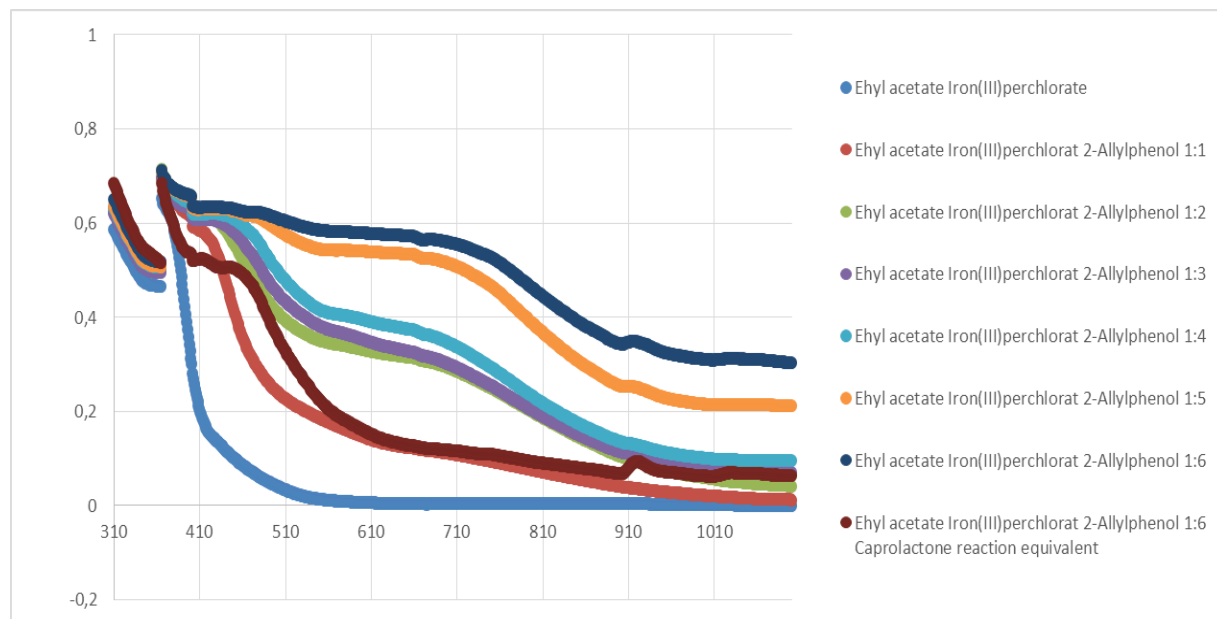

Figure 23. UV-Vis Experiment iron(III) perchlorate with 2-allylphenol in ethyl acetate

The measurement could not be investigated in  $\epsilon$ -caprolactone, because the polymerization occurred too fast. Caprolactone leads to a replacement of 2-allylphenol in the iron-complex.
